# Supplementary material
Source: PubMed Central journal article supplement (PMC3982759)
Supplement: supp_pp.113.235077_235077supp.pdf [file supp_pp.113.235077_235077supp.pdf]

# Supplementary Figure 1

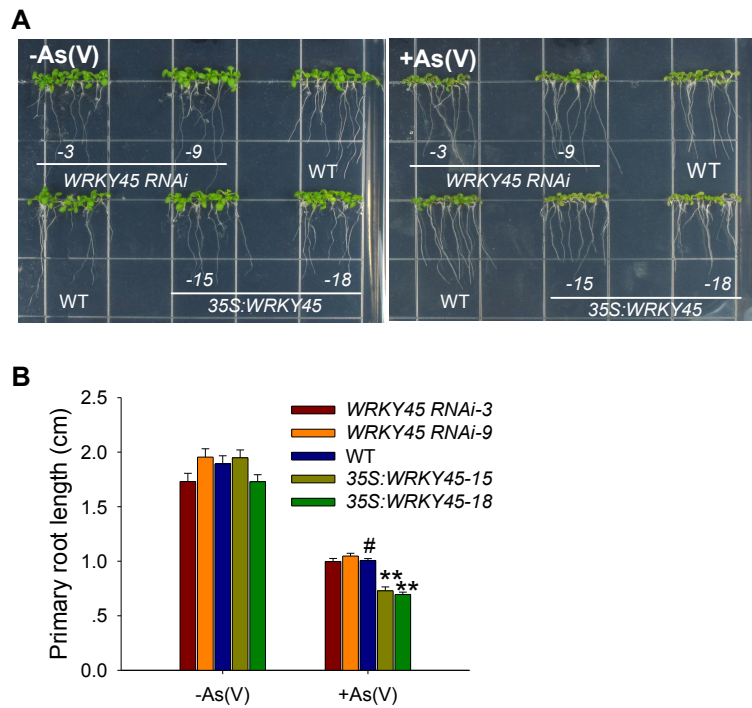

**Supplementary Figure 1.** Arsenate tolerance phenotype of WRKY45-overexpressing lines, WRKY45 RNAi lines and wild-type seedlings.

(A) Arsenate tolerance phenotype of plants germinated and grown on MS medium with (+AsV) or without (-AsV) arsenate for 9 d. (B) Primary root length. Values are means  $\pm$  SE ( $n = 20-30$ ) of each genotype per treatment. Asterisks indicate statistically significant differences compared with wild-type (Student's test,  $P < 0.05$ ). Wild-type plants (WT) were used as a control (#).

## Supplementary Figure 2

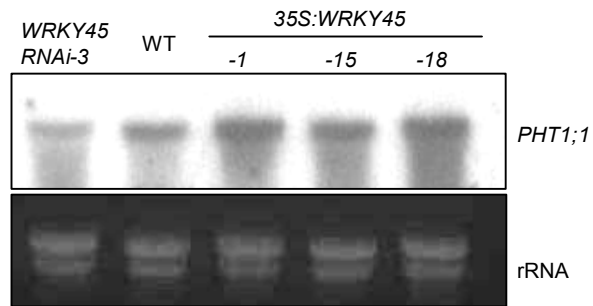

**Supplementary Figure 2.** RNA gel blot analysis of *PHT1;1* expression in the roots of the *WRKY45*-overexpressing lines, *WRKY45* RNAi line and wild-type plants. Ethidium bromide staining of rRNA bands are included as the loading control.

## Supplementary Figure 3

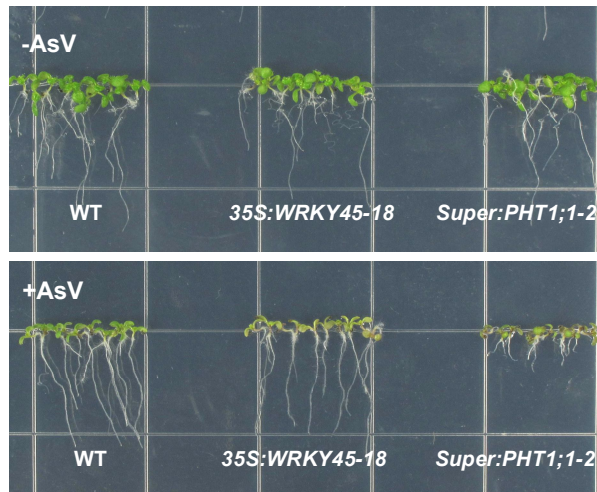

**Supplementary Figure 3.** Arsenate tolerance phenotype of *PHT1;1*-overexpressing lines and wild-type seedlings.

Arsenate tolerance phenotype of plants germinated and grown on MS medium with (+AsV) or without (-AsV) arsenate for 9 d.

## Supplementary Figure 4

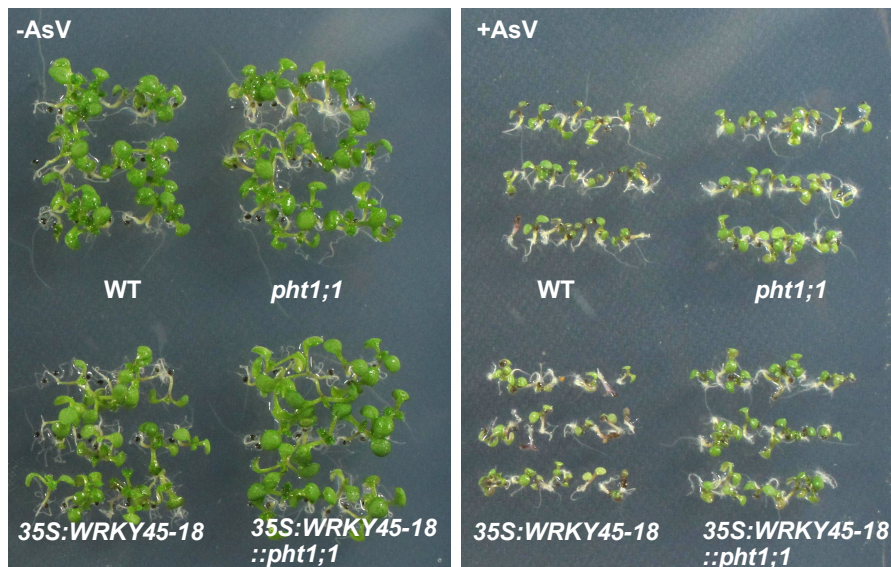

**Supplementary Figure 4.** Arsenate tolerance phenotype of *35S:WRKY45-18*, *pht1;1* mutant, *35S:WRKY45-18::pht1;1*, and wild-type seedlings.

Arsenate tolerance phenotype of plants germinated and grown on MS medium with (+AsV) or without (-AsV) arsenate for 9 d.

# Supplemental Table S1

Table S1. Primer sequences used in this study.

| Primer name                                    | Primer sequence (5'-3')                               | Vector name/Description |
|------------------------------------------------|-------------------------------------------------------|-------------------------|
| <b>Primers used in transgenic construction</b> |                                                       |                         |
| WRKY45 GFP F                                   | GGATCCATGGAGGATAGGAGGTGTGATGTG                        | Super1300               |
| WRKY45 GFP R                                   | GAGCTCTTCCTCAAGCAAAAGGGAGG                            |                         |
| WRKY45 OF                                      | GCTCTAGAATGGAGGATAGGAGGTGTGA                          | pBI121                  |
| WRKY45 OR                                      | GGGGTACCTCATTCTTCAAGCAAAAGGGA                         |                         |
| WRKY45 RNAi F:                                 | GGACTAGTGGCGCGCCATGCGTACACGGTAGCGAAGAT                | pBI121                  |
| WRKY45 RNAi R                                  | GGGGTACCAGATCTATTTAAATTAGTTTGAAATTTGAATCCATTG<br>AACC |                         |
| PHT1;1 OF                                      | GCTCTAGAATGGCCGAACAACAACACTAGGAG                      | Super1300               |
| PHT1;1 OR                                      | CCAAGCTTTTTCTCGTCATGGCTAACCTCA                        |                         |
| ProWRKY45 F                                    | CGTCGACCATCGCTTCCATCTAGCCA                            | pCAMBIA 1381            |
| ProWRKY45 R                                    | ACTGCAGTTCTTAACTCCCTCTGCGTTTAT                        |                         |
| ProPHT1;1 F                                    | CTGCAGACAACGCAAAGAATCCAA                              | pCAMBIA 1381            |
| ProPHT1;1 R                                    | GTCGACATCTCCCAAATGCCGATA                              |                         |
| <b>Primers used in ChIP</b>                    |                                                       |                         |
| ProPHT1;1 ChIP1F                               | GTCAAATGCTCTGTTCCA                                    |                         |
| ProPHT1;1 ChIP1R                               | CATACAACGCAAAGAATCC                                   |                         |
| ProPHT1;1 ChIP2F                               | TAAACATACGGAGGGAGT                                    |                         |
| ProPHT1;1 ChIP2R                               | GGAGAGTTGAGGAGAGACT                                   |                         |
| ProPHT1;1 ChIP3F                               | TGTAATGGCAACTAAGTCC                                   |                         |
| ProPHT1;1 ChIP3R                               | TTTGAGGAGTGACAATCAG                                   |                         |
| ProPHT1;1 ChIP4F                               | ATGTTTCGTAATGGTGGAT                                   |                         |
| ProPHT1;1 ChIP4R                               | CTGTGTAGTAGAGATAAGCA                                  |                         |
| <b>Primers used in qPCR</b>                    |                                                       |                         |
| WRKY45 qPCR F                                  | TGCACAGAAGAAGGATGCAG                                  |                         |
| WRKY45 qPCR R                                  | TGGTATGTCGTCACCACCAC                                  |                         |
| PHT1;1 qPCR F                                  | CCTTTGGGTTCCCTATATGCG                                 |                         |
| PHT1;1 qPCR R                                  | TAACCTCAGCCTCACCAGAG                                  |                         |
| ACT2/8 qPCR F                                  | ACGGTAACATTGTGCTCAGTGGTG                              |                         |
| ACT2/8 qPCR R                                  | CTTGGAGATCCACATCTGCTGGA                               |                         |
| <b>Primers used in EMSA</b>                    |                                                       |                         |
| Pht1;1 EMSA1F                                  | GTGTATATACCATTTCAAGT                                  |                         |
| Pht1;1 EMSA1R                                  | CTATAATCATACAACGCAAA                                  |                         |
| Pht1;1 EMSA4F                                  | GCGATGCGTAATGTGATATT                                  |                         |
| Pht1;1 EMSA4R                                  | GAATGTTTTGTTGTTATA                                    |                         |
